# Supplementary material for: Differential expression of a virulence factor in pathogenic and non-pathogenic mycobacteria
Source: PubMed Central journal article supplement (PMC2784876; doi:10.1111/j.1365-2958.2009.06612.x), 2009-02-19
Supplement: mmi0072-0041-SD1.pdf [file mmi0072-0041-SD1.pdf]

## SUPPLEMENTARY MATERIAL

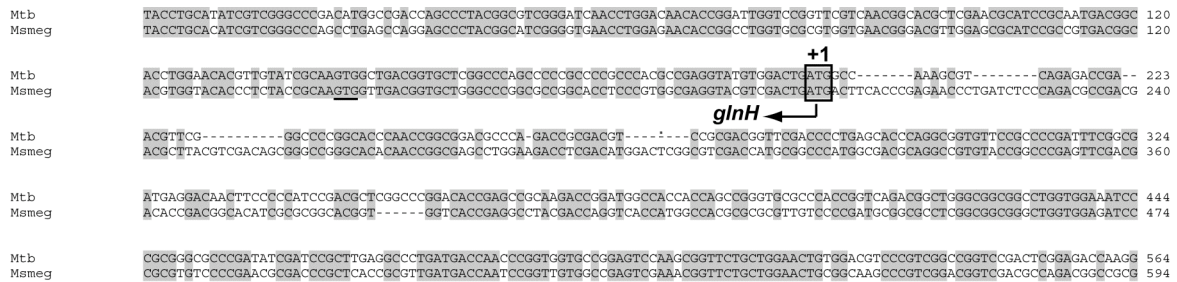

**Figure S1.** Investigation of the translational start of *M. smegmatis pknG*. Alignment of the first 328 and 388 nucleotides of *pknG* from *M. tuberculosis* (Mtb) and *M. smegmatis* (Msmeg), respectively, including the upstream 200 nucleotides. The limits of gene upstream of *pknG*, *glnH*, is indicated. Identical residues are shown in grey. The translational start codon of *M. smegmatis pknG* was annotated on the TIGR Comprehensive Microbial Resource (CMR) home page at a GTG (underlined) further upstream of the kinase domain compared to the other *pknG* homologues (see Figure 1). However, alignment of the *M. smegmatis* and *M. tuberculosis pknG* including their upstream nucleotides revealed not only that the upstream regions are highly conserved as well, but also that an ATG downstream of the annotated start codon in the *M. smegmatis* sequence aligned to the start codon of *M. tuberculosis pknG* (both are framed). Since *M. tuberculosis* PknG with this start codon is an active kinase (Walburger et al., 2004) and rescues *M. bovis* BCG  $\Delta pknG$  from lysosomal delivery when expressed in *trans* (Houben et al., 2006), we propose this ATG is the most probable start codon of *M. smegmatis pknG*. *M. smegmatis pknG* with this start codon was cloned into pMV361 to obtain pMV-PknG<sup>smeg</sup>.

SUPPLEMENTARY MATERIAL

**Table S1.** List of primers and probe used for cloning of the constructs analyzed in Figure 8 and for the (q)RT-PCR reactions in Figure 7 and 8.

| Primer name         | Sequence (5' to 3')                        |
|---------------------|--------------------------------------------|
| AclI-BCG0451c.fw    | GTGCTAAGAATAACGTTAGTTTCGTTGCGTTAG<br>CCGAA |
| BCG-Pk-EcoRV.rev    | CCTCAAGCGGATCGATATCG                       |
| AclI-MSMEG_0788.fw  | GTGCTAAGAATAACGTTAGAGCCGTAAGCATCG<br>AAAC  |
| Smeg-Pk-XmnI.rev    | CAGTTCAGCAGAACCGTTTC                       |
| Smeg-Pk_BCG-UTR.rev | GGTGAAGTCATCAGTCCACATACCTCGG               |
| BCG-Pk_Smeg-UTR.rev | GCTTTGGCCATCAGTCGACGTACCTCG                |
| BCG-UTR_Smeg-Pk.fw  | TATGTGGACTGATGACTTCACCCGAGAACCC            |
| Smeg-UTR_BCG-Pk.fw  | ACGTCGACTGATGGCCAAAGCGTCAGAGAC             |
| RT-PknG.fw          | GCCACCGACATCTACACCGT                       |
| RT-PknG.rev         | GGTGTGCGCCACCAGCAG                         |
| 16S-RNA.fw          | ACGAACAACGCGACAAACC                        |
| 16S-RNA.rev         | CCAGCAGCCGCGGTAA                           |
| qRT-BCG.fw          | CGGCCAGTACGAGGTCAAAG                       |
| qRT-BCG.rev         | GCGGTCGAGAGCGAGGTAG                        |
| qRT-smeg.fw         | CGACCAGTACGAGATCAAGGGT                     |
| qRT-smeg.rev        | TCTTGTCGAACGCCAGGTACA                      |
| PknG-probe          | 6FAM-CCGCCGTGCGCGAT-MGBNFQ                 |

SUPPLEMENTARY MATERIAL

**Table S2.** Sources and growth conditions of the various mycobacterial species analyzed for PknG expression in Figure 9.

| Mycobacterial species         | Source             | Medium    | Temperature |
|-------------------------------|--------------------|-----------|-------------|
| <i>M. abscessus</i>           | ATCC 19977         | mod. LJ*  | 35°C        |
| <i>M. africanum</i>           | Swiss NCM ***      | mod. LJ   | 35°C        |
| <i>M. avium subsp. avium</i>  | MAC101             | mod. LJ   | 35°C        |
| <i>M. bohemicum</i>           | Clinical isolate   | mod. LJ   | 35°C        |
| <i>M. bovis</i>               | ATCC 19210         | mod. LJ   | 35°C        |
| <i>M. bovis biovar. BCG</i>   | ATCC 35734         | mod. LJ   | 35°C        |
| <i>M. bovis subsp. caprae</i> | Clinical isolate   | mod. LJ   | 35°C        |
| <i>M. chelonae</i>            | DSM 43804          | mod. LJ   | 35°C        |
| <i>M. fortuitum</i>           | ATCC 49403         | mod. LJ   | 35°C        |
| <i>M. goodnae</i>             | Pasteur 14021.001  | mod. LJ   | 35°C        |
| <i>M. haemophilum</i>         | ATCC 29548         | MB 7H10** | 28°C        |
| <i>M. intracellulare</i>      | Clinical isolate   | mod. LJ   | 35°C        |
| <i>M. kansasii</i>            | NCTC 10268         | mod. LJ   | 35°C        |
| <i>M. lentiflavum</i>         | Clinical isolate   | mod. LJ   | 35°C        |
| <i>M. malmoense</i>           | NCTC 11298         | mod. LJ   | 35°C        |
| <i>M. marinum</i>             | ATCC 927           | mod. LJ   | 28°C        |
| <i>M. scrofulaceum</i>        | Pasteur 14022.0031 | mod. LJ   | 35°C        |
| <i>M. simiae</i>              | Clinical isolate   | mod. LJ   | 35°C        |
| <i>M. smegmatis</i>           | Pasteur 14133.0001 | mod. LJ   | 35°C        |
| <i>M. terrae</i>              | Clinical isolate   | mod. LJ   | 35°C        |
| <i>M. tuberculosis H37Rv</i>  | Pasteur 14001.0001 | mod. LJ   | 35°C        |
| <i>M. xenopi</i>              | Clinical isolate   | mod. LJ   | 35°C        |

\* modified Löwenstein-Jensen

\*\* Middlebrook with 10% OADC-Enrichment supplement with 0.4% Ferrum-Ammonium-Citrat

\*\*\*Swiss NCM: Swiss National Centre for Mycobacteria, Zurich.
